# Supplementary material for: A Comparative Study on Two Territorial Fishes: The Influence of Physical Enrichment on Aggressive Behavior
Source: MDPI journal article supplement (doi:10.3390/ani11071868), 2021-06-23
Supplement: s1 [file s1]

## **A comparative study on two territorial fishes: the influence of physical enrichment on aggressive behavior**

Zonghang Zhang <sup>1</sup>, Yiqiu Fu <sup>1</sup>, Zhen Zhang <sup>1</sup>, Xiumei Zhang <sup>2,3,\*</sup>, Shengcan Chen <sup>4</sup>

<sup>1</sup> The Key Laboratory of Mariculture, Ministry of Education, Ocean University of China, Qingdao 266003, China; zonghangzhang@126.com (Z.Z.); 17860826125@163.com (Y.F.); ouczhangz@163.com (Z.Z.)

<sup>2</sup> Fisheries College, Zhejiang Ocean University, Zhoushan 316022, China; xmzhang1227@163.com (X.Z.)

<sup>3</sup> Laboratory for Marine Fisheries Science and Food Production Processes, Qingdao National Laboratory for Marine Science and Technology, Qingdao 266237, China

<sup>4</sup> National Fisheries Technology Extension Center, Beijing 100125, China; ziyuanyhc@126.com (S.C.)

\* Correspondence: xmzhang1227@163.com

**Table S1.**

The statistical results of the number of aggressive behavior in black rockfish among treatments within specific recording day.

| Record day | Contrast                | Estimate | z.ratio | p.value |
|------------|-------------------------|----------|---------|---------|
| Day 1      | (0-level) vs. (1-level) | 0.7069   | 3.471   | 0.0069  |
|            | (0-level) vs. (2-level) | 0.3202   | 1.774   | 0.4826  |
|            | (0-level) vs. (4-level) | 1.2947   | 5.130   | <.0001  |
|            | (0-level) vs. (6-level) | 0.3392   | 1.869   | 0.4212  |
|            | (0-level) vs. (8-level) | 0.1316   | 0.768   | 0.9728  |
|            | (1-level) vs. (2-level) | -0.3868  | -1.791  | 0.4717  |
|            | (1-level) vs. (4-level) | 0.5878   | 2.108   | 0.2832  |
|            | (1-level) vs. (6-level) | -0.3677  | -1.696  | 0.5344  |
|            | (1-level) vs. (8-level) | -0.5754  | -2.762  | 0.0638  |
|            | (2-level) vs. (4-level) | 0.9746   | 3.714   | 0.0028  |
|            | (2-level) vs. (6-level) | 0.0190   | 0.098   | 1.0000  |
|            | (2-level) vs. (8-level) | -0.1886  | -1.015  | 0.9130  |
|            | (4-level) vs. (6-level) | 0.9555   | -3.632  | 0.0038  |
|            | (4-level) vs. (8-level) | -1.1632  | -4.540  | 0.0001  |
|            | (6-level) vs. (8-level) | -0.2076  | -1.112  | 0.8766  |
| Day 3      | (0-level) vs. (1-level) | -0.0645  | -0.402  | 0.9987  |
|            | (0-level) vs. (2-level) | 0.0548   | 0.331   | 0.9995  |
|            | (0-level) vs. (4-level) | -0.2364  | -1.530  | 0.6446  |
|            | (0-level) vs. (6-level) | -0.0263  | -0.162  | 1.0000  |
|            | (0-level) vs. (8-level) | 0.0270   | 0.164   | 1.0000  |
|            | (1-level) vs. (2-level) | 0.1193   | 0.732   | 0.9780  |
|            | (1-level) vs. (4-level) | -0.1719  | -1.132  | 0.8680  |
|            | (1-level) vs. (6-level) | 0.0382   | 0.239   | 0.9999  |
|            | (1-level) vs. (8-level) | 0.0916   | 0.566   | 0.9932  |
|            | (2-level) vs. (4-level) | -0.2912  | -1.856  | 0.4295  |
|            | (2-level) vs. (6-level) | -0.0811  | -0.493  | 0.9964  |
|            | (2-level) vs. (8-level) | -0.0278  | -0.167  | 1.0000  |
|            | (4-level) vs. (6-level) | 0.2101   | 1.370   | 0.7451  |
|            | (4-level) vs. (8-level) | 0.2634   | 1.692   | 0.5368  |
|            | (6-level) vs. (8-level) | 0.0533   | 0.327   | 0.9995  |
| Day 5      | (0-level) vs. (1-level) | 0.0991   | 0.861   | 0.9556  |
|            | (0-level) vs. (2-level) | 0.1562   | 1.338   | 0.7639  |

|       |                         |         |        |        |
|-------|-------------------------|---------|--------|--------|
|       | (0-level) vs. (4-level) | 0.1131  | 0.979  | 0.9246 |
|       | (0-level) vs. (6-level) | 0.4942  | 3.836  | 0.0017 |
|       | (0-level) vs. (8-level) | 0.5046  | 3.904  | 0.0013 |
|       | (1-level) vs. (2-level) | 0.0572  | 0.478  | 0.9969 |
|       | (1-level) vs. (4-level) | 0.0140  | 0.118  | 1.0000 |
|       | (1-level) vs. (6-level) | 0.3951  | 3.008  | 0.0315 |
|       | (1-level) vs. (8-level) | 0.4055  | 3.077  | 0.0255 |
|       | (2-level) vs. (4-level) | -0.0432 | -0.360 | 0.9992 |
|       | (2-level) vs. (6-level) | 0.3379  | 2.543  | 0.1119 |
|       | (2-level) vs. (8-level) | 0.3483  | 2.613  | 0.0941 |
|       | (4-level) vs. (6-level) | 0.3811  | 2.893  | 0.0442 |
|       | (4-level) vs. (8-level) | 0.3915  | 2.963  | 0.0361 |
|       | (6-level) vs. (8-level) | 0.0104  | 0.072  | 1.0000 |
| Day 7 | (0-level) vs. (1-level) | 0.0445  | 0.447  | 0.9978 |
|       | (0-level) vs. (2-level) | 0.3221  | 3.004  | 0.0319 |
|       | (0-level) vs. (4-level) | 0.3629  | 3.344  | 0.0107 |
|       | (0-level) vs. (6-level) | 0.7478  | 6.098  | <.0001 |
|       | (0-level) vs. (8-level) | 0.8239  | 6.597  | <.0001 |
|       | (1-level) vs. (2-level) | 0.2776  | 2.565  | 0.1060 |
|       | (1-level) vs. (4-level) | 0.3185  | 2.908  | 0.0424 |
|       | (1-level) vs. (6-level) | 0.7033  | 5.694  | <.0001 |
|       | (1-level) vs. (8-level) | 0.7885  | 6.202  | <.0001 |
|       | (2-level) vs. (4-level) | 0.0408  | 0.350  | 0.9993 |
|       | (2-level) vs. (6-level) | 0.4257  | 3.277  | 0.0134 |
|       | (2-level) vs. (8-level) | 0.5108  | 3.831  | 0.0018 |
|       | (4-level) vs. (6-level) | 0.3848  | 2.939  | 0.0387 |
|       | (4-level) vs. (8-level) | 0.4700  | 3.498  | 0.0062 |
|       | (6-level) vs. (8-level) | 0.0852  | 0.583  | 0.9922 |

**Table S2.**

The statistical results of the number of aggressive behavior in black rockfish among recording days within specific treatment group.

| Treatment | Contrast        | Estimate | z.ratio | p.value |
|-----------|-----------------|----------|---------|---------|
| 0-level   | day 1 vs. day 3 | -0.0270  | -0.164  | 0.9984  |
|           | day 1 vs. day 5 | -0.7784  | -5.506  | <.0001  |
|           | day 1 vs. day 7 | -1.0423  | -7.657  | <.0001  |
|           | day 3 vs. day 5 | -0.7514  | -5.364  | <.0001  |
|           | day 3 vs. day 7 | -1.0152  | -7.533  | <.0001  |
|           | day 5 vs. day 7 | -0.2638  | -2.502  | 0.0596  |
| 1-level   | day 1 vs. day 3 | -0.7985  | -3.979  | 0.0004  |
|           | day 1 vs. day 5 | -1.3863  | -7.440  | <.0001  |
|           | day 1 vs. day 7 | -1.7047  | -9.409  | <.0001  |
|           | day 3 vs. day 5 | -0.5878  | -4.215  | 0.0001  |
|           | day 3 vs. day 7 | -0.9062  | -6.841  | <.0001  |
|           | day 5 vs. day 7 | -0.3185  | -2.908  | 0.0191  |
| 2-level   | day 1 vs. day 3 | -0.2924  | -1.611  | 0.3725  |
|           | day 1 vs. day 5 | -0.9424  | -5.820  | <.0001  |
|           | day 1 vs. day 7 | -1.0403  | -6.510  | <.0001  |
|           | day 3 vs. day 5 | -0.6500  | -4.439  | 0.0001  |
|           | day 3 vs. day 7 | -0.7480  | -5.192  | <.0001  |
|           | day 5 vs. day 7 | -0.0980  | -0.828  | 0.8414  |
| 4-level   | day 1 vs. day 3 | -1.5581  | -6.333  | <.0001  |
|           | day 1 vs. day 5 | -1.9601  | -8.207  | <.0001  |
|           | day 1 vs. day 7 | -1.9741  | -8.273  | <.0001  |
|           | day 3 vs. day 5 | -0.4020  | -3.033  | 0.0130  |
|           | day 3 vs. day 7 | -0.4159  | -3.147  | 0.0090  |
|           | day 5 vs. day 7 | -0.0140  | -0.118  | 0.9994  |
| 6-level   | day 1 vs. day 3 | -0.3926  | -2.187  | 0.1268  |
|           | day 1 vs. day 5 | -0.6235  | -3.628  | 0.0016  |
|           | day 1 vs. day 7 | -0.6337  | -3.694  | 0.0013  |
|           | day 3 vs. day 5 | -0.2309  | -1.513  | 0.4297  |
|           | day 3 vs. day 7 | -0.2412  | -1.584  | 0.3880  |
|           | day 5 vs. day 7 | -0.0103  | -0.072  | 0.9999  |
| 8-level   | day 1 vs. day 3 | -0.1316  | -0.768  | 0.8687  |
|           | day 1 vs. day 5 | -0.4055  | -2.513  | 0.0580  |

|  |                 |         |        |        |
|--|-----------------|---------|--------|--------|
|  | day 1 vs. day 7 | -0.3409 | -2.085 | 0.1579 |
|  | day 3 vs. day 5 | -0.2739 | -1.764 | 0.2910 |
|  | day 3 vs. day 7 | -0.2094 | -1.329 | 0.5443 |
|  | day 5 vs. day 7 | 0.0645  | 0.440  | 0.9716 |

**Table S3.**

The statistical results of the number of aggressive behavior in fat greenling among treatments within specific recording day.

| Record day | Contrast                | Estimate | z.ratio | p.value |
|------------|-------------------------|----------|---------|---------|
| Day 1      | (0-level) vs. (1-level) | -1.23676 | -3.266  | 0.0139  |
|            | (0-level) vs. (2-level) | -1.60944 | -4.408  | 0.0002  |
|            | (0-level) vs. (4-level) | -1.17007 | -3.066  | 0.0264  |
|            | (0-level) vs. (6-level) | -0.89382 | -2.259  | 0.2111  |
|            | (0-level) vs. (8-level) | -1.63142 | -4.476  | 0.0001  |
|            | (1-level) vs. (2-level) | -0.37268 | -1.597  | 0.6008  |
|            | (1-level) vs. (4-level) | 0.06669  | 0.258   | 0.9998  |
|            | (1-level) vs. (6-level) | 0.34294  | 1.230   | 0.8221  |
|            | (1-level) vs. (8-level) | -0.39465 | -1.698  | 0.5328  |
|            | (2-level) vs. (4-level) | 0.43937  | 1.845   | 0.4366  |
|            | (2-level) vs. (6-level) | 0.71562  | 2.751   | 0.0657  |
|            | (2-level) vs. (8-level) | -0.02198 | -0.105  | 1.0000  |
|            | (4-level) vs. (6-level) | 0.27625  | 0.977   | 0.9253  |
|            | (4-level) vs. (8-level) | -0.46135 | -1.946  | 0.3741  |
|            | (6-level) vs. (8-level) | -0.73760 | -2.845  | 0.0506  |
| Day 3      | (0-level) vs. (1-level) | 0.14953  | 0.610   | 0.9903  |
|            | (0-level) vs. (2-level) | -0.78593 | -3.908  | 0.0013  |
|            | (0-level) vs. (4-level) | -0.60614 | -2.925  | 0.0402  |
|            | (0-level) vs. (6-level) | 0.05716  | 0.239   | 0.9999  |
|            | (0-level) vs. (8-level) | -0.70694 | -3.471  | 0.0069  |
|            | (1-level) vs. (2-level) | -0.93546 | -4.414  | 0.0001  |
|            | (1-level) vs. (4-level) | -0.75567 | -3.471  | 0.0069  |
|            | (1-level) vs. (6-level) | -0.09237 | -0.372  | 0.9991  |
|            | (1-level) vs. (8-level) | -0.85647 | -3.995  | 0.0009  |
|            | (2-level) vs. (4-level) | 0.17979  | 1.078   | 0.8902  |
|            | (2-level) vs. (6-level) | 0.84309  | 4.110   | 0.0006  |
|            | (2-level) vs. (8-level) | 0.07899  | 0.487   | 0.9966  |
|            | (4-level) vs. (6-level) | 0.66329  | 3.142   | 0.0208  |
|            | (4-level) vs. (8-level) | -0.10080 | -0.593  | 0.9915  |
|            | (6-level) vs. (8-level) | -0.76410 | -3.680  | 0.0032  |
| Day 5      | (0-level) vs. (1-level) | -0.08269 | -0.454  | 0.9976  |
|            | (0-level) vs. (2-level) | -0.38221 | -2.244  | 0.2176  |

|       |                         |          |        |        |
|-------|-------------------------|----------|--------|--------|
|       | (0-level) vs. (4-level) | -0.23002 | -1.308 | 0.7810 |
|       | (0-level) vs. (6-level) | 0.09015  | 0.474  | 0.9970 |
|       | (0-level) vs. (8-level) | -0.12921 | -0.718 | 0.9798 |
|       | (1-level) vs. (2-level) | -0.29952 | -1.802 | 0.4646 |
|       | (1-level) vs. (4-level) | -0.14732 | -0.857 | 0.9566 |
|       | (1-level) vs. (6-level) | 0.17284  | 0.927  | 0.9396 |
|       | (1-level) vs. (8-level) | -0.04652 | -0.264 | 0.9998 |
|       | (2-level) vs. (4-level) | 0.15219  | 0.954  | 0.9323 |
|       | (2-level) vs. (6-level) | 0.47236  | 2.699  | 0.0754 |
|       | (2-level) vs. (8-level) | 0.25300  | 1.542  | 0.6369 |
|       | (4-level) vs. (6-level) | 0.32017  | 1.774  | 0.4826 |
|       | (4-level) vs. (8-level) | 0.10080  | 0.593  | 0.9915 |
|       | (6-level) vs. (8-level) | -0.21936 | -1.189 | 0.8422 |
| Day 7 | (0-level) vs. (1-level) | -0.30855 | -2.134 | 0.2695 |
|       | (0-level) vs. (2-level) | -0.36865 | -2.582 | 0.1016 |
|       | (0-level) vs. (4-level) | -0.36028 | -2.519 | 0.1184 |
|       | (0-level) vs. (6-level) | -0.01198 | -0.077 | 1.0000 |
|       | (0-level) vs. (8-level) | 0.42986  | 2.459  | 0.1366 |
|       | (1-level) vs. (2-level) | -0.06010 | -0.459 | 0.9975 |
|       | (1-level) vs. (4-level) | -0.05174 | -0.394 | 0.9988 |
|       | (1-level) vs. (6-level) | 0.29657  | 2.059  | 0.3093 |
|       | (1-level) vs. (8-level) | 0.73840  | 4.463  | 0.0001 |
|       | (2-level) vs. (4-level) | 0.00837  | 0.065  | 1.0000 |
|       | (2-level) vs. (6-level) | 0.35667  | 2.507  | 0.1219 |
|       | (2-level) vs. (8-level) | 0.79851  | 4.873  | <.0001 |
|       | (4-level) vs. (6-level) | 0.34831  | 2.444  | 0.1412 |
|       | (4-level) vs. (8-level) | 0.79014  | 4.816  | <.0001 |
|       | (6-level) vs. (8-level) | 0.44183  | 2.533  | 0.1145 |

**Table S4.**

The statistical results of the number of aggressive behavior in fat greenling among recording days within specific treatment group.

| Treatment | Contrast        | Estimate | z.ratio | p.value |
|-----------|-----------------|----------|---------|---------|
| 0-level   | day 1 vs. day 3 | -1.3863  | -3.720  | 0.0011  |
|           | day 1 vs. day 5 | -1.8632  | -5.201  | <.0001  |
|           | day 1 vs. day 7 | -2.2216  | -6.330  | <.0001  |
|           | day 3 vs. day 5 | -0.4769  | -2.248  | 0.1106  |
|           | day 3 vs. day 7 | -0.8353  | -4.186  | 0.0002  |
|           | day 5 vs. day 7 | -0.3584  | -2.094  | 0.1549  |
| 1-level   | day 1 vs. day 3 | 0.0000   | 0.000   | 1.0000  |
|           | day 1 vs. day 5 | -0.7091  | -3.232  | 0.0067  |
|           | day 1 vs. day 7 | -1.2934  | -6.379  | <.0001  |
|           | day 3 vs. day 5 | -0.7091  | -3.232  | 0.0067  |
|           | day 3 vs. day 7 | -1.2934  | -6.379  | <.0001  |
|           | day 5 vs. day 7 | -0.5843  | -3.716  | 0.0012  |
| 2-level   | day 1 vs. day 3 | -0.5628  | -3.013  | 0.0138  |
|           | day 1 vs. day 5 | -0.6360  | -3.450  | 0.0031  |
|           | day 1 vs. day 7 | -0.9808  | -5.611  | <.0001  |
|           | day 3 vs. day 5 | -0.0732  | -0.468  | 0.9660  |
|           | day 3 vs. day 7 | -0.4180  | -2.885  | 0.0204  |
|           | day 5 vs. day 7 | -0.3448  | -2.432  | 0.0711  |
| 4-level   | day 1 vs. day 3 | -0.8224  | -3.691  | 0.0013  |
|           | day 1 vs. day 5 | -0.9232  | -4.206  | 0.0002  |
|           | day 1 vs. day 7 | -1.4118  | -6.817  | <.0001  |
|           | day 3 vs. day 5 | -0.1008  | -0.593  | 0.9341  |
|           | day 3 vs. day 7 | -0.5895  | -3.841  | 0.0007  |
|           | day 5 vs. day 7 | -0.4887  | -3.287  | 0.0056  |
| 6-level   | day 1 vs. day 3 | -0.4353  | -1.591  | 0.3837  |
|           | day 1 vs. day 5 | -0.8792  | -3.467  | 0.0030  |
|           | day 1 vs. day 7 | -1.3398  | -5.594  | <.0001  |
|           | day 3 vs. day 5 | -0.4439  | -2.020  | 0.1804  |
|           | day 3 vs. day 7 | -0.9045  | -4.450  | 0.0001  |
|           | day 5 vs. day 7 | -0.4605  | -2.625  | 0.0430  |
| 8-level   | day 1 vs. day 3 | -0.4608  | -2.453  | 0.0675  |
|           | day 1 vs. day 5 | -0.3610  | -1.880  | 0.2368  |



|  |                 |         |        |        |
|--|-----------------|---------|--------|--------|
|  | day 1 vs. day 7 | -0.1603 | -0.799 | 0.8548 |
|  | day 3 vs. day 5 | 0.1008  | 0.593  | 0.9341 |
|  | day 3 vs. day 7 | 0.3015  | 1.680  | 0.3345 |
|  | day 5 vs. day 7 | 0.2007  | 1.094  | 0.6935 |
